# Supplementary material
Source: MDPI journal article supplement (https://www.mdpi.com/2304-6732/7/4/84)
Supplement: s1 [file s1]

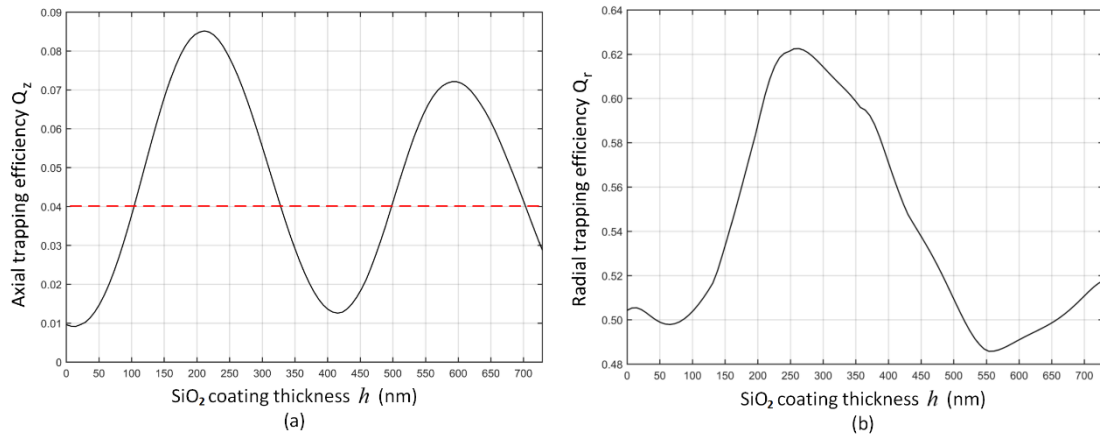

**Figure S1.** Axial (a) and radial (b) trapping efficiency for a coated BTG sphere with a core radius of 2.5 $\mu$ m, as the SiO<sub>2</sub> coating thickness varies.

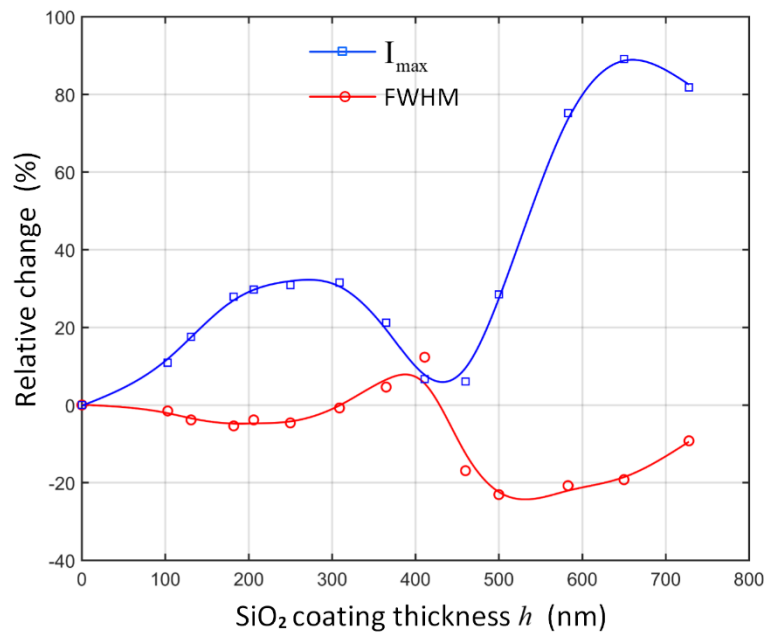

**Figure S2.** Relative change of the FWHM and maximum optical intensity of PNJs for a 2.5 $\mu$ m-core-radius BTG sphere with different SiO<sub>2</sub> coating thickness.

**Table S1.** Optical trapping efficiency and PNJ property of five different microspheres in water

| Microsphere                             | Optical trapping efficiency |       | PNJ property |                 |
|-----------------------------------------|-----------------------------|-------|--------------|-----------------|
|                                         | $Q_z$                       | $Q_r$ | FWHM (nm)    | $I_{\max}(I_0)$ |
| Uncoated PS                             | 0.052                       | 0.442 | 376          | 73              |
| Uncoated MF                             | 0.043                       | 0.411 | 346          | 109             |
| Uncoated BTG                            | 0.010                       | 0.504 | 260          | 165             |
| BTG with 211nm SiO <sub>2</sub> coating | 0.085                       | 0.602 | 248          | 214             |
| BTG with 583nm SiO <sub>2</sub> coating | 0.071                       | 0.488 | 206          | 289             |

\* These microspheres have the same core radius of 2.5 $\mu$ m.
